# Supplementary material for: Transportable system enabling multiple irradiation studies under simultaneous hypoxia in vitro
Source: Springer Nature journal article supplement (doi:10.1186/s13014-018-1169-9), 2018-11-13
Supplement: MOESM1 [file 16269878]

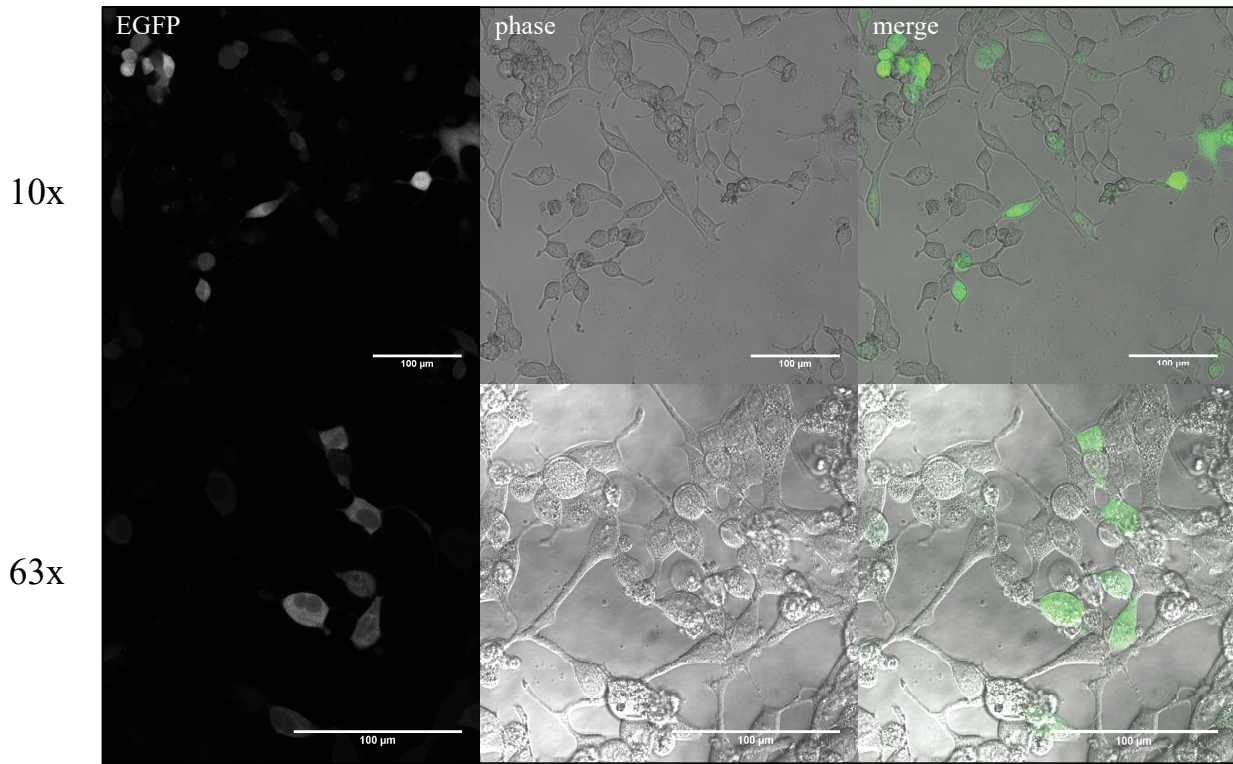

Figure S1: Live cell images of EGFP expressing prostate cancer cell line LNCaP cells. The images were obtained using 10x and 63x magnifications.
