# Supplementary material for: Transportable system enabling multiple irradiation studies under simultaneous hypoxia in vitro
Source: Springer Nature journal article supplement (doi:10.1186/s13014-018-1169-9), 2018-11-13
Supplement: MOESM2 [file 16269878]

## HeLa

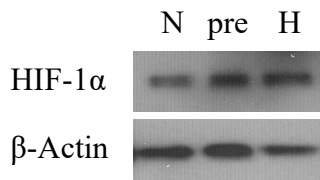

Figure S2: The samples can be collected without performing hypoxic preconditioning on the washing buffer. The cells were washed twice before collecting using either PBS stored in normal 21% oxygen pressure (N) or preconditioned for 24 hours in 1% oxygen pressure (pre). As a control there is a sample which is collected inside the hypoxia incubator using preconditioned washing buffer (H).
